# Supplementary material
Source: Elsevier journal article supplement (https://www.sciencedirect.com/science/article/pii/S0300289622005804)
Supplement: mmc1 [file S0300289622005804:mmc1.pdf]

## **COLGAJO RADIAL IZQUIERDO CÓMO TRATAMIENTO PARA FÍSTULA TRAQUEO-GÁSTRICA**

Autores:

- Alejandro Jove Lamas: Médico Interno Residente de Neumología del Hospital Universitari i Politècnic La Fe. Av. Fernando Abril Martorell, 106, 46026, Valencia.
  - Email: [alexjovelamas@gmail.com](mailto:alexjovelamas@gmail.com)
- José Cerón Navarro: Médico Especialista de Cirugía Torácica del Hospital Universitari i Politècnic La Fe. Av. Fernando Abril Martorell, 106, 46026, Valencia.
  - Email: [ceronjs@yahoo.es](mailto:ceronjs@yahoo.es)
- Enrique Cases Viedma: Médico Especialista de Neumología del Hospital Universitari i Politècnic La Fe. Av. Fernando Abril Martorell, 106, 46026, Valencia.
  - Email: [cases\\_enr@gva.es](mailto:cases_enr@gva.es)

Varón de 56 años intervenido de un adenocarcinoma esofágico al que se practicó esofagectomía con anastomosis esófago gástrica intratorácica. Posterior a la intervención presentó una estenosis anastomótica refractaria a múltiples dilataciones, por lo que se decide, tras un año de seguimiento, colocar una prótesis metálica recubierta. Tras la intervención, comienza con clínica de tos persistente confirmándose la presencia de una fístula bronco-gástrica y tras 6 meses de seguimiento, reaparición de la clínica de estenosis esofágica requiriendo la sustitución de la endoprótesis. En bronoscopias de control se observa una impronta distal en la *pars* membranosa traqueal con extensión hasta bronquio principal derecho. Tras empeoramiento clínico del paciente con sialorrea y tos irritativa con la ingesta, se realizó una tomografía computarizada torácica (TC) y broncoscopia que demostraron una migración de la endoprótesis hasta tercio distal de la tráquea por rotura de la *pars* membranosa, aflorando por encima de la carina principal (Fig. 1A, vídeo). Finalmente se realizó, mediante la colaboración de los servicios de Cirugía Plástica y Torácica, gastrectomía total, cierre del defecto traqueal con colgajo miocutáneo radial izquierdo<sup>1</sup> y coloplastia (Fig. 1B, vídeo). Actualmente, 36 meses tras la intervención, sigue controles endoscópicos periódicos que muestran injerto bien posicionado sin comunicación aéreo-digestiva.

1. Poissonnet V, Culie D, Rouanet C, Bozec A. Tracheoesophageal fistula and pharyngoesophageal stenosis repair by double skin paddle radial forearm flap. Eur Ann Otorhinolaryngol Head Neck Dis. 2021 Sep 14; <https://doi.org/10.1016/j.anorl.2021.09.002>

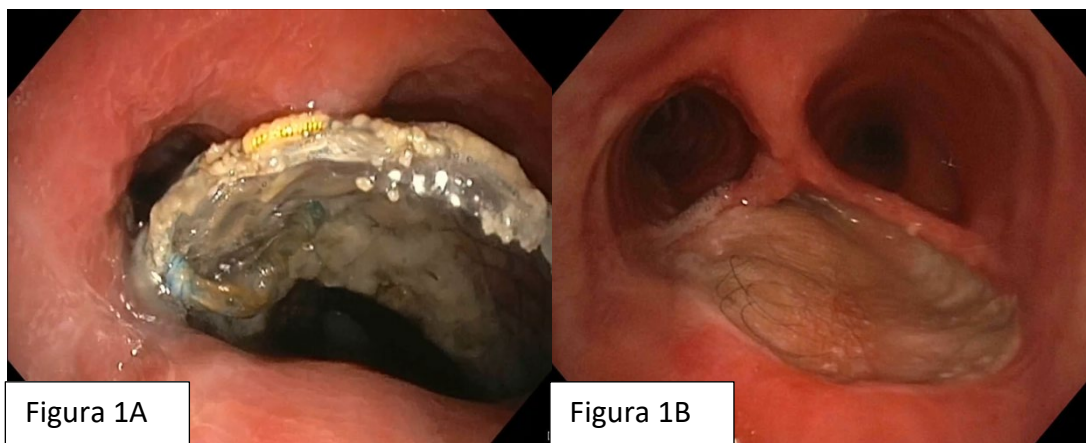

Figura 1. Prótesis esofágica aflorando por encima de la carina principal tras rotura de la *pars* membranosa traqueal (Figura 1A); Colgajo miocutáneo radial bien posicionado con fístula cerrada con pelos en su superficie. (Figura 1B).
